# Supplementary material for: Soil moisture–atmosphere coupling strength over central Europe in the recent warming climate
Source: Copernicus journal article supplement (doi:10.5194/nhess-25-1405-2025), 2025-04-14
Supplement: Supplementary file 1 [file nhess-25-1405-2025-supplement.pdf]

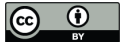

*Supplement of*

## **Soil moisture–atmosphere coupling strength over central Europe in the recent warming climate**

**Thomas Schwitalla et al.**

*Correspondence to:* Thomas Schwitalla ([thomas.schwitalla@uni-hohenheim.de](mailto:thomas.schwitalla@uni-hohenheim.de))

The copyright of individual parts of the supplement might differ from the article licence.

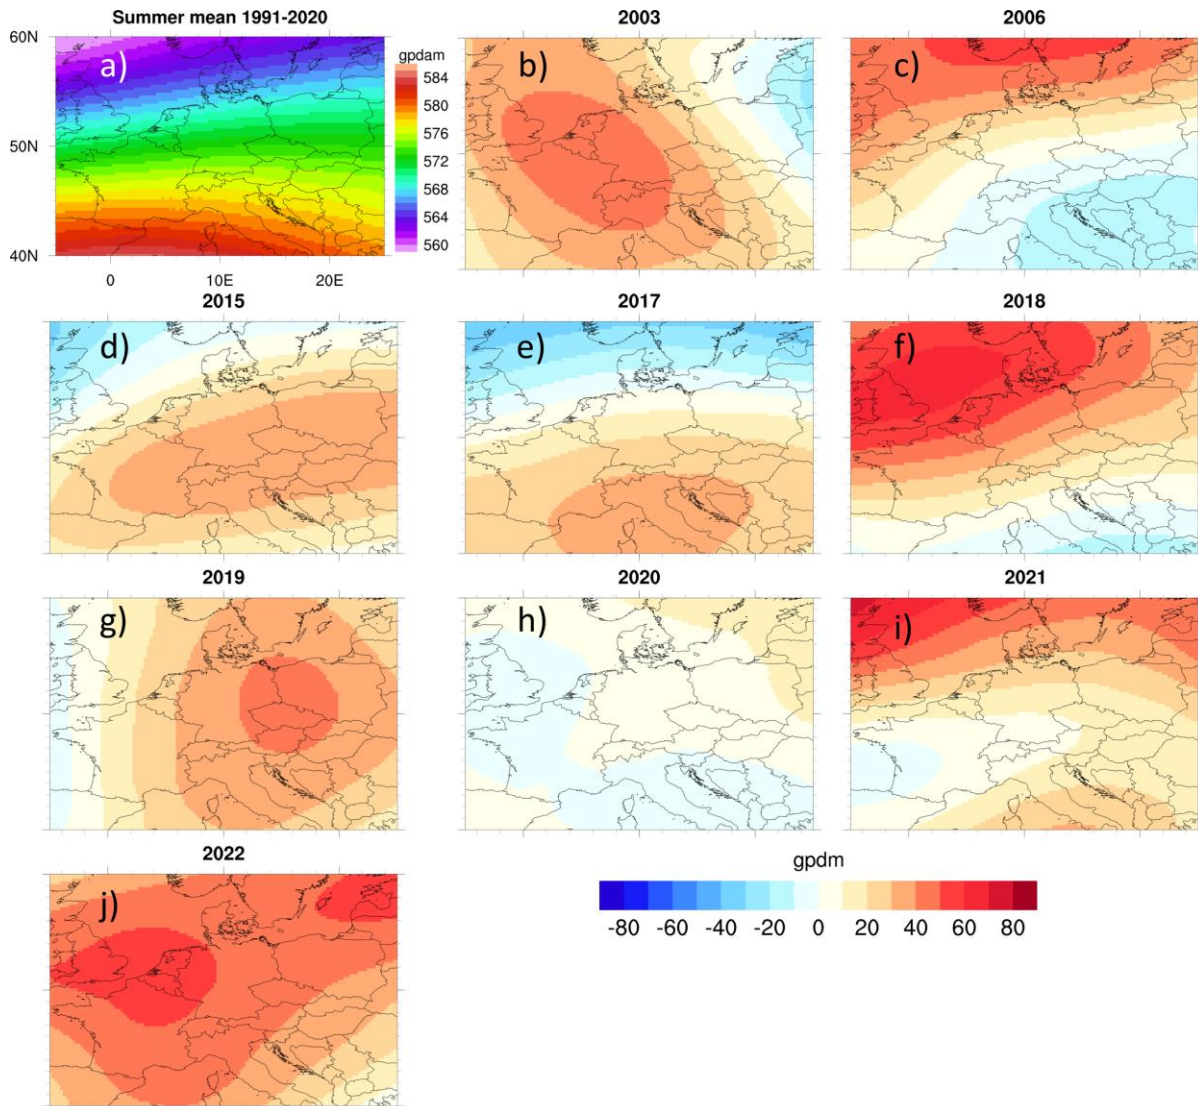

**Figure S1.** ERA5 500hPa geopotential anomalies [gpdam] for the selected summer seasons with respect to the summer mean of 1991-2020. The top left panel shows the mean summer 500 hPa geopotential from 1991 to 2020.

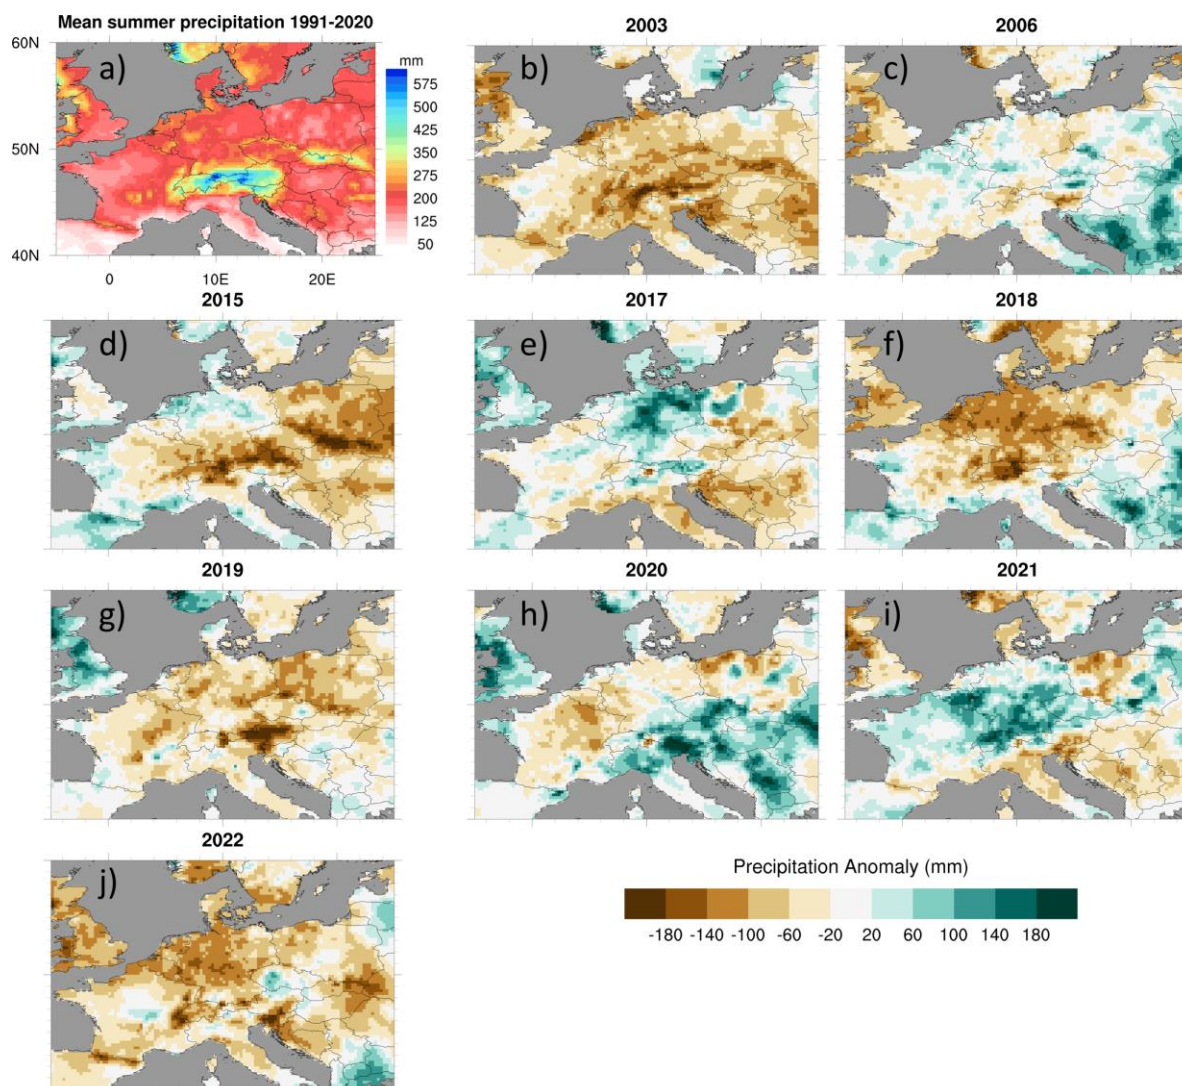

**Figure S2.** E-OBS precipitation anomalies [mm] for the selected summer seasons with respect to the summer mean 1991-2020. The top left panel denotes the mean summer precipitation from 1991 to 2020.



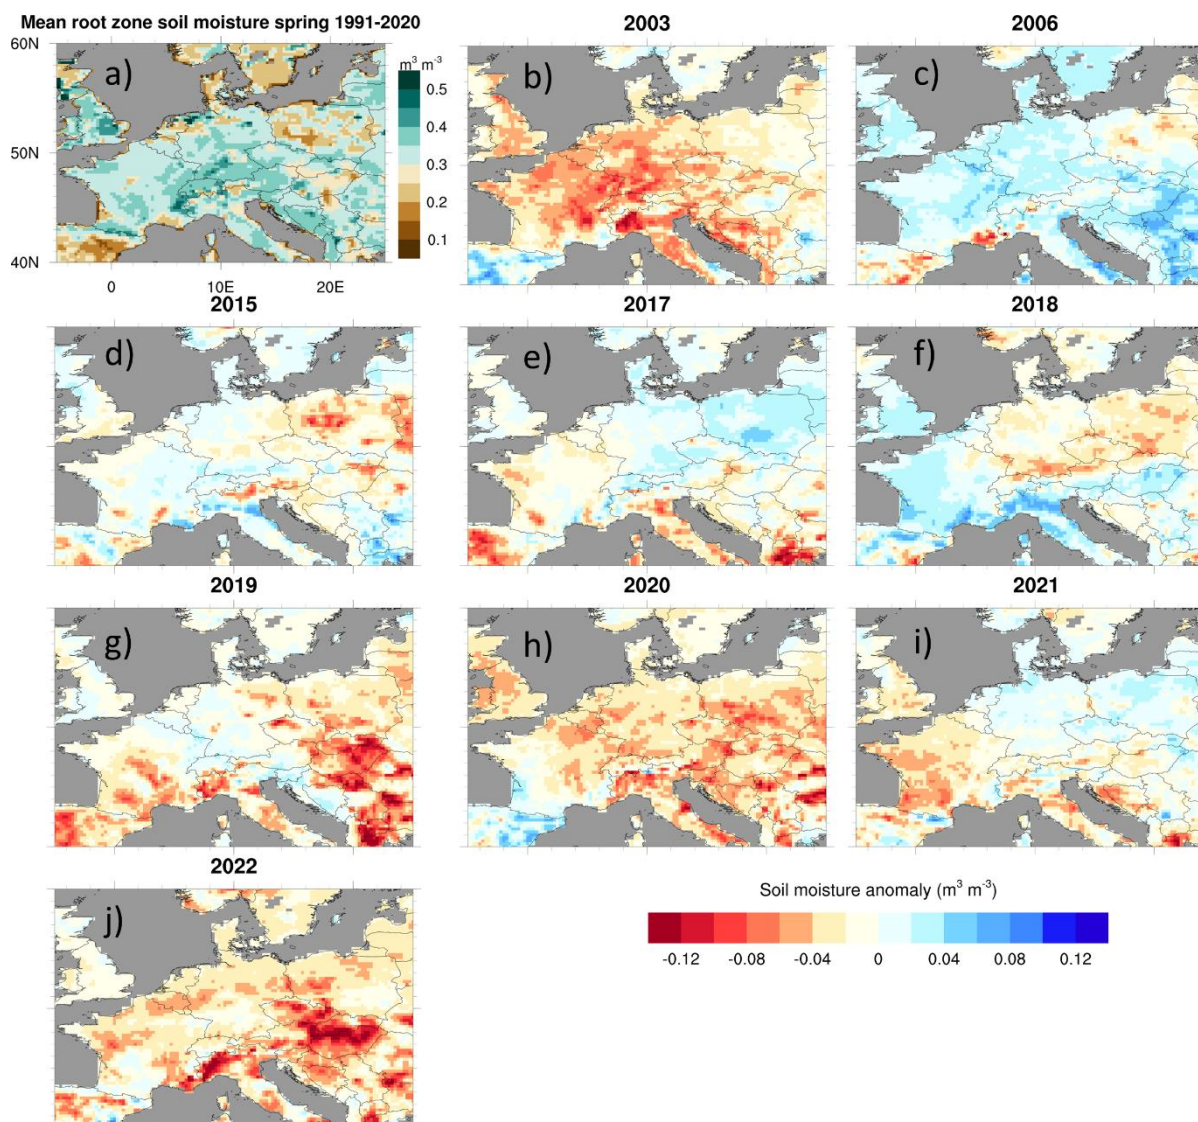

**Figure S3.** ERA5 soil moisture anomalies [ $\text{m}^3 \text{m}^{-3}$ ] with respect to 1991-2020 for the spring seasons corresponding to the evaluated summer seasons. The top left panel denotes the spring mean root zone soil moisture 1991-2020 from ERA5.

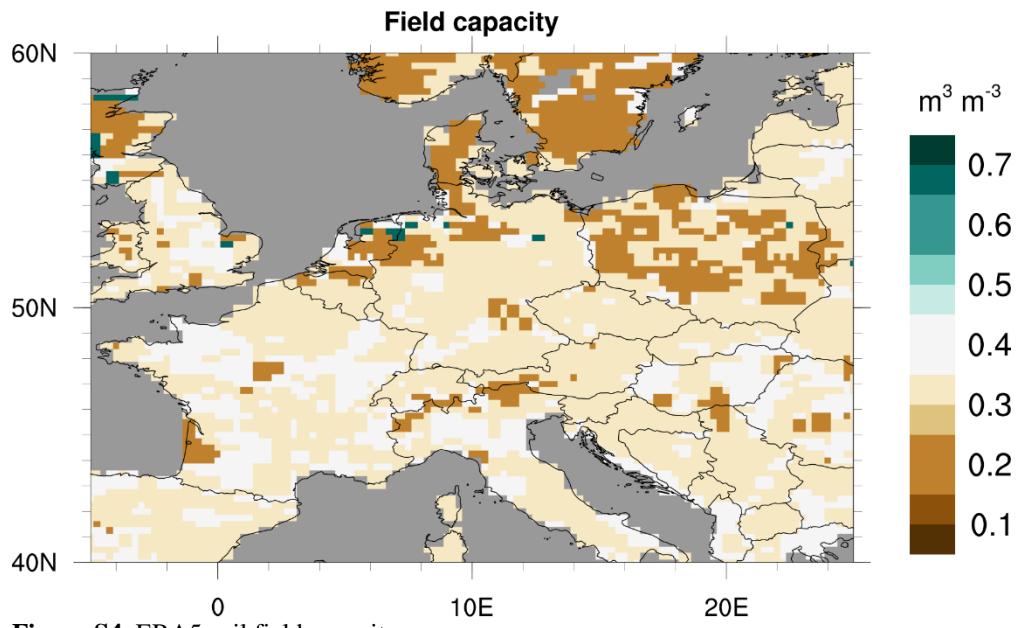

**Figure S4.** ERA5 soil field capacity.

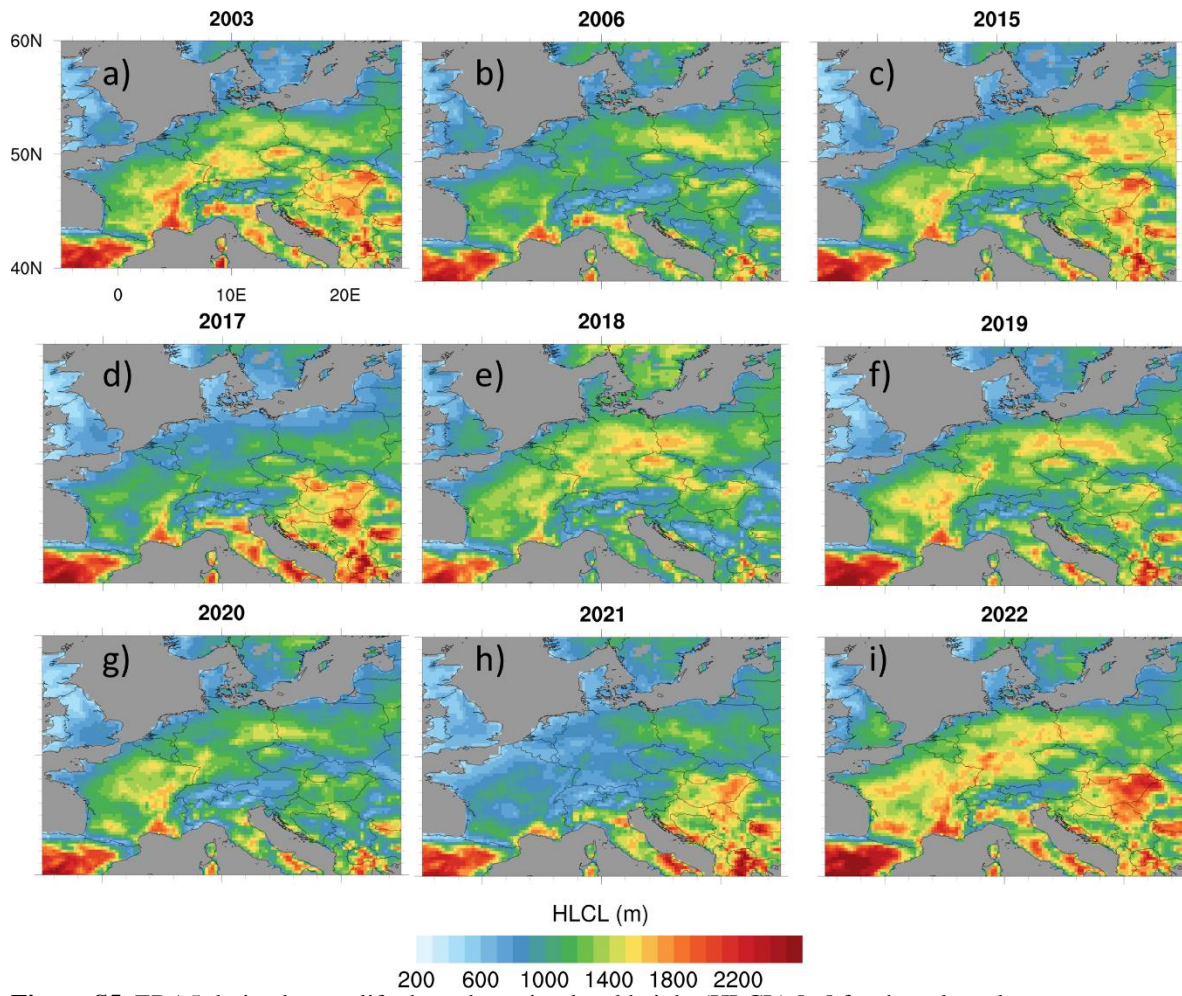

**Figure S5.** ERA5 derived mean lifted condensation level height (HLCL) [m] for the selected summer seasons.
